# Supplementary material for: Tetrandrine alleviates oxaliplatin-induced mechanical allodynia via modulation of inflammation-related genes
Source: Front Mol Neurosci. 2024 Feb 14;17:1333842. doi: 10.3389/fnmol.2024.1333842 (PMC10899404; doi:10.3389/fnmol.2024.1333842)
Supplement: Supplementary file 2 [file Table_2.XLSX]

## Sheet: Supplementary File S2
	Oxaliplatin				Tetrandrine				Oxaliplatin				Tetrandrine
#ID	B1_Count	B2_Count	B3_Count	B4_Count	C1_Count	C2_Count	C3_Count	C4_Count	B1_FPKM	B2_FPKM	B3_FPKM	B4_FPKM	C1_FPKM	C2_FPKM	C3_FPKM	C4_FPKM	PValue	log2FC	regulated
Speer4e	0	0	0	0	4	0	4	0	0	0	0	0	0.037345	0	0.055064	0	0.0486634	4.07592	up
Krtap28-10	2	3	3	0	0	0	0	0	0.02351	0.056973	0.045685	0	0	0	0	0	0.029502	-4.14844	down
Vmn2r86	5	0	4	8	12	10	9	7	0.010947	0	0.010424	0.015429	0.031585	0.029446	0.024289	0.020087	0.0255899	1.26532	up
Ikzf2	294	236	366	75	465	474	336	437	0.869407	0.69056	0.86167	0.577544	0.985637	1.23948	0.797454	1.18451	0.0287123	0.810669	up
Prss45	0	0	0	0	0	3	6	10	0	0	0	0	0	0.050435	0.091894	0.192523	0.00128747	5.39803	up
Phc3	4884	3946	971	1379	1272	1070	1105	1024	14.1829	11.395	6.92372	7.04305	7.88137	7.70069	7.7731	8.15894	0.000625815	-1.34595	down
Spata48	3	0	5	10	11	9	7	16	0.041956	0	0.073337	0.109282	0.135937	0.127828	0.092589	0.27403	0.0271673	1.41358	up
Sarnp	93	311	541	472	133	128	311	175	1.77565	9.16132	12.7304	8.06738	2.68389	3.03385	7.33707	4.55536	0.0383002	-0.845934	down
Lrrc19	35	29	52	59	26	15	40	13	0.249128	0.273412	0.398055	0.329049	0.177392	0.118598	0.308948	0.110373	0.0281668	-0.808326	down
Krt26	12	9	8	11	22	20	16	16	0.095618	0.097998	0.062082	0.066743	0.164328	0.182741	0.141596	0.156547	0.0165119	0.956079	up
Stard6	51	33	30	52	78	61	67	51	0.894204	0.826789	0.551525	0.760357	1.03842	0.923365	1.07046	0.837282	0.00387372	0.712377	up
Gm5460	0	0	0	0	0	0	0	9	0	0	0	0	0	0	0	0.052326	0.0382996	4.4007	up
Hif3a	321	263	283	373	813	1020	813	927	1.5911	1.71521	1.23625	1.22043	2.99051	4.62343	3.29842	4.29149	5.76e-28	1.6186	up
Gja6	4	3	11	14	4	0	4	0	0.029879	0.028203	0.10838	0.110449	0.038346	0	0.043762	0	0.0270315	-1.83418	down
Abcc6	161	105	87	160	93	43	97	38	0.724865	0.573214	0.379562	0.707319	0.551863	0.242108	0.429362	0.276932	0.00353681	-0.855145	down
Zfp54	70	24	20	43	88	72	44	63	0.582216	0.317954	0.358758	0.497447	0.674687	0.569956	0.340785	0.541836	0.0156944	0.86144	up
Gm45713	0	0	13	0	0	0	0	0	0	0	0.179533	0	0	0	0	0	0.0204816	-4.78623	down
H2-Q7	19	19	24	25	58	28	44	43	0.243243	0.32264	0.336241	0.290562	0.945379	0.403172	0.617345	0.678911	0.000893349	1.05414	up
H2-Q6	17	25	18	38	76	33	84	58	0.162432	0.324566	0.185618	0.286948	0.897833	0.358856	1.02079	0.888006	4.64e-05	1.4327	up
Gm49395	0	0	1	137	3	1	1	0	0	0	0.000481	3.2152	0.089308	0.000332	0.000194	0	0.00272705	-4.28588	down
C130074G19Rik	527	387	437	755	361	265	333	333	3.48263	3.47149	3.14552	3.96384	2.29495	1.98155	2.41838	2.68922	4.62e-05	-0.596503	down
Krt33a	0	0	0	0	6	6	2	1	0	0	0	0	0.06878	0.079762	0.014457	0.013851	0.00131571	4.97595	up
Psg19	0	0	0	0	3	0	5	3	0	0	0	0	0.018371	0	0.041933	0.023348	0.00900159	4.56536	up
Gm3532	0	0	0	0	0	7	0	5	0	0	0	0	0	0.113135	0	0.072758	0.0173	4.75808	up
Gm14440	0	0	0	15	0	0	0	0	0	0	0	0.069406	0	0	0	0	0.0249098	-4.64287	down
Abo	12	6	8	12	2	0	2	0	0.122044	0.090219	0.096566	0.096791	0.021354	0	0.02437	0	3.51e-05	-3.01493	down
Mmp25	18	26	34	56	22	6	19	11	0.07755	0.156428	0.163044	0.195907	0.093719	0.030119	0.088997	0.059009	0.0091921	-1.11123	down
Gm28036	77	257	386	278	1807	71	1230	1337	0.557504	1.91132	2.46459	1.01019	7.1822	0.476704	5.52277	6.83228	0.000363431	2.1628	up
Calcoco2	6	9	0	5	3	0	0	0	0.070354	0.145819	0	0.039322	0.029675	0	0	0	0.0434576	-2.61699	down
Pmel	31	24	22	42	37	39	54	37	0.403408	0.307085	0.219971	0.308972	0.330861	0.624512	0.5591	0.502584	0.0422111	0.589251	up
Zfp986	1	0	0	4	12	7	5	7	0.01488	0	0	0.044594	0.16251	0.102079	0.069588	0.115146	0.000445649	2.64233	up
Zfp980	0	0	0	0	7	0	3	3	0	0	0	0	0.044004	0	0.011017	0.016358	0.00489457	4.76281	up
Rtn4rl2	11	4	3	12	3	4	2	0	0.160667	0.083409	0.033554	0.141672	0.039994	0.061287	0.026508	0	0.0332457	-1.5667	down
Arl4d	469	229	247	400	875	767	625	563	6.80606	4.51332	3.89994	4.61126	12.2366	12.6106	9.97583	10.0072	1.6e-11	1.16301	up
Pf4	11	0	5	5	19	8	21	6	0.357251	0	0.188558	0.135505	0.59266	0.389391	0.755863	0.250749	0.0287975	1.43611	up
Lipt1	160	85	102	196	56	48	118	78	2.58238	1.81387	1.80471	2.2136	1.15904	1.07396	2.12524	1.64436	0.0144132	-0.720113	down
Cyp2a5	8	0	0	2	0	0	0	0	0.079835	0	0	0.01541	0	0	0	0	0.0462657	-4.29387	down
Lgals7	0	0	0	0	0	3	9	0	0	0	0	0	0	0.060291	0.256961	0	0.0220131	4.69853	up
Mertk	853	573	694	1010	1137	1213	1156	1099	3.98059	3.629	3.52169	3.73833	5.10879	6.40503	5.92747	6.27514	9.08e-09	0.659841	up
Nos1	1209	689	819	1178	1509	2666	804	1581	3.08971	2.46495	2.27231	2.64703	3.0024	6.27253	2.00856	3.96022	0.000709322	0.864617	up
Nlrc5	45	70	52	96	132	82	99	75	0.117698	0.328679	0.204107	0.324063	0.623724	0.373841	0.332747	0.405865	0.0182101	0.621859	up
Add2	4451	2466	9682	3669	3172	2649	2610	2362	13.2668	16.2734	26.5525	13.1456	14.2641	14.3611	13.739	13.5129	0.00238239	-0.856727	down
Adgra2	663	499	584	916	489	419	446	305	2.77992	2.63416	2.35675	2.6666	1.89035	1.79927	2.08905	1.66757	6.42e-06	-0.590811	down
Nmnat3	100	59	43	81	126	99	101	97	0.925901	0.729645	0.520201	0.593812	1.21699	1.07983	1.27034	1.09896	0.00719305	0.659217	up
Cysltr2	59	46	69	41	32	20	44	17	0.671225	0.70959	0.846306	0.364851	0.346483	0.25796	0.54825	0.234849	0.0124866	-0.896285	down
Lao1	8	0	4	0	4	14	3	26	0.068301	0	0.036232	0	0.030781	0.127847	0.018788	0.26969	0.0465372	2.07425	up
Gprc5c	91	63	58	140	61	33	66	40	0.522902	0.557256	0.34917	0.681704	0.353416	0.224376	0.471769	0.283714	0.0114551	-0.703193	down
Ifi211	4	4	7	8	11	15	21	5	0.033762	0.05966	0.074909	0.071002	0.113524	0.190838	0.25203	0.06195	0.022796	1.24764	up
Ifi213	2	4	4	13	10	25	26	6	0.009769	0.03955	0.029894	0.073319	0.06506	0.213931	0.207216	0.044711	0.00842506	1.67103	up
Pbld2	48	54	29	46	77	94	48	75	0.673421	0.658816	0.285422	0.324999	0.836534	0.958082	0.711743	1.15312	0.0166193	0.781262	up
Gm42688	267	523	228	288	257	196	199	152	1.47654	3.92674	1.37035	1.26063	1.36741	1.22506	1.20909	1.02556	0.0147457	-0.736513	down
Sbk2	8	6	4	16	22	16	13	10	0.071813	0.073152	0.039106	0.11379	0.318807	0.154892	0.123889	0.109826	0.0373408	0.939849	up
Yipf7	0	0	0	0	8	4	4	0	0	0	0	0	0.111035	0.074337	0.070359	0	0.00176194	5.03955	up
Zfp872	4	3	4	12	12	22	9	14	0.098813	0.018432	0.135094	0.064647	0.137782	0.202886	0.066345	0.114771	0.00638812	1.43831	up
Gm43720	1	1	1	1	1	37	25	4	0.000133	2e-06	6.5e-05	7.7e-05	0.00024	0.130369	0.083407	0.013802	0.000300902	4.00365	up
Rnf151	0	0	0	0	4	6	10	0	0	0	0	0	0.064723	0.102001	0.170046	0	0.000862484	5.38874	up
Mbd3l2	0	0	0	0	7	3	0	0	0	0	0	0	0.054828	0.031882	0	0	0.0308694	4.36044	up
Cep112	45	48	58	81	112	71	89	83	0.264192	0.415988	0.362037	0.392294	0.700444	0.479342	0.565306	0.645373	0.00232061	0.696384	up
Trpc2	0	0	0	0	0	0	0	60	0	0	0	0	0	0	0	0.508271	0.000183657	7.10799	up
Thbd	410	349	388	601	261	163	285	210	2.21094	2.54923	2.2775	2.56949	1.35253	0.991331	1.68538	1.38569	6.9e-07	-0.837073	down
Slirp	409	331	414	535	719	572	507	685	4.75589	5.19355	5.88013	5.62419	7.71934	6.57823	6.69063	8.57611	5.31e-06	0.646223	up
Tgtp2	21	47	42	85	105	66	88	62	0.146251	0.451058	0.323365	0.478704	0.72065	0.533087	0.683764	0.541508	0.0146702	0.804382	up
Nkx3-2	0	4	0	8	0	0	0	0	0	0.063472	0	0.064929	0	0	0	0	0.0253008	-4.55263	down
1810049J17Rik	39	26	24	90	9	23	14	27	1.66179	1.52548	1.11903	3.09839	0.36447	1.09076	0.633325	1.42792	0.0180189	-1.08294	down
Gm3460	0	0	4	8	0	0	0	0	0	0	0.0403	0.070002	0	0	0	0	0.0276949	-4.46914	down
Prnd	0	0	0	0	0	8	0	2	0	0	0	0	0	0.087313	0	0.024483	0.0302732	4.48775	up
Arid3c	0	0	0	0	0	7	0	4	0	0	0	0	0	0.085595	0	0.056136	0.02133	4.63206	up
Ripk4	45	12	27	40	44	45	60	36	0.247003	0.091099	0.164282	0.173066	0.235879	0.280585	0.368212	0.246258	0.0312477	0.698014	up
Wnt8a	0	7	7	6	0	2	0	0	0	0.093682	0.075121	0.052952	0	0.026036	0	0	0.0146385	-3.01267	down
Sec31b	42	37	38	40	78	58	59	39	0.209433	0.255411	0.210684	0.161297	0.379533	0.332868	0.325301	0.23739	0.0218223	0.62348	up
Resf1	301	114	535	186	442	544	304	575	1.32772	1.27047	2.0077	0.671071	1.83311	2.87747	1.33669	2.35842	0.0251319	0.799337	up
Vmn2r78	0	0	3	11	0	0	0	0	0	0	0.008178	0.033474	0	0	0	0	0.0194811	-4.63378	down
Lrmda	58	37	29	63	86	61	79	55	1.07209	0.969647	0.597417	0.950197	1.55673	1.29952	1.6084	1.2283	0.00871222	0.675037	up
Gm5431	9	4	4	8	13	9	21	19	0.055907	0.028481	0.026549	0.06367	0.078292	0.067106	0.148848	0.14969	0.00493852	1.40377	up
Kif23	35	40	53	41	16	22	23	20	0.203818	0.364175	0.337748	0.186038	0.090339	0.143274	0.148938	0.147796	0.00332108	-0.996128	down
Kif2c	0	2	3	6	3	12	16	9	0	0.019185	0.021496	0.028321	0.014986	0.094108	0.118979	0.077449	0.00762831	1.96402	up
Prkar2b	2484	1772	1004	3138	976	2135	889	750	14.7984	14.2963	7.96319	15.7017	7.42932	14.3622	7.34839	7.19677	0.0167074	-0.701979	down
Tacstd2	7	4	2	7	12	9	7	12	0.06947	0.06285	0.025115	0.055108	0.122888	0.104806	0.088692	0.167127	0.0418787	1.08107	up
Chp2	60	26	34	71	27	26	29	26	0.827087	0.482067	0.506574	0.769224	0.351345	0.394442	0.437128	0.434894	0.0247772	-0.691596	down
Clec1b	0	0	2	2	7	6	5	10	0	0	0.023857	0.029142	0.118735	0.12307	0.096231	0.224241	0.000246128	2.77712	up
Synpo2l	14	10	12	22	28	22	23	16	0.064005	0.061918	0.055247	0.077567	0.120963	0.113701	0.114062	0.086827	0.0456163	0.708398	up
Vmn2r1	36	35	29	22	72	62	67	42	0.104347	0.138697	0.091809	0.051074	0.200443	0.205025	0.215274	0.147166	0.00154005	1.01348	up
Igf2bp1	0	4	4	0	0	0	0	0	0	0.013016	0.010437	0	0	0	0	0	0.0406246	-4.21696	down
Cfap97d1	0	0	0	0	4	3	1	1	0	0	0	0	0.104843	0.085491	0.035583	0.028165	0.014879	4.27055	up
Cox6a2	8	5	8	2	16	24	10	14	0.231252	0.168569	0.24432	0.046447	0.438659	0.794743	0.31135	0.491759	0.00521425	1.5054	up
Ms4a14	0	0	0	0	0	4	6	0	0	0	0	0	0	0.022366	0.032246	0	0.0303708	4.4512	up
Uba1y	0	0	0	0	9	0	3	0	0	0	0	0	0.040994	0	0.011086	0	0.0254881	4.58978	up
Plekha4	29	25	48	54	68	47	53	66	0.208529	0.510558	0.412136	0.440097	0.49286	0.392603	0.426265	0.630357	0.0139674	0.685019	up
Kcnj16	3694	2768	3575	1194	954	920	3542	568	20.2076	20.5168	21.286	5.17443	5.01781	5.67893	21.2884	3.79024	0.0442339	-0.917676	down
Kcnj15	6	12	5	6	2	6	0	0	0.021127	0.052564	0.015327	0.016741	0.006779	0.019921	0	0	0.0412275	-1.80677	down
Mucl3	4	4	8	0	0	0	0	0	0.030775	0.041764	0.066421	0	0	0	0	0	0.00175917	-5.10696	down
Smpd5	16	2	8	11	20	20	19	23	0.16461	0.022189	0.087643	0.08616	0.295644	0.22975	0.284645	0.424468	0.00436372	1.26341	up
Gm17190	2	3	3	0	0	0	0	0	0.022071	0.058381	0.040708	0	0	0	0	0	0.0294842	-4.14841	down
Tomm20l	0	0	0	0	2	0	2	3	0	0	0	0	0.04025	0	0.070218	0.100793	0.045087	3.95832	up
Olfr558	72	84	78	99	49	45	81	33	0.472896	0.752429	0.560463	0.517856	0.311036	0.335604	0.587245	0.265639	0.0311166	-0.621192	down
Treml2	9	0	9	5	14	7	27	10	0.066866	0	0.048737	0.037118	0.06755	0.070374	0.148646	0.06112	0.0297656	1.419	up
Tgm6	5	0	5	0	0	0	0	0	0.024152	0	0.026282	0	0	0	0	0	0.0279391	-4.37919	down
Nutm1	12	5	2	19	17	21	12	19	0.064431	0.033283	0.011718	0.07816	0.08614	0.127773	0.069386	0.12315	0.0431194	1.01553	up
Sec16b	29	13	25	32	59	57	31	29	0.131713	0.083072	0.113342	0.108435	0.240897	0.276461	0.144778	0.149236	0.00521368	0.920469	up
C130026I21Rik	0	0	0	0	0	2	3	2	0	0	0	0	0	0.023337	0.031077	0.024472	0.0443215	3.97948	up
Mrln	7	3	8	3	2	0	0	0	0.286156	0.184614	0.367462	0.071943	0.054268	0	0	0	0.00272542	-3.08049	down
Rfx8	13	8	14	8	6	5	0	5	0.124345	0.106185	0.147397	0.061902	0.054566	0.053731	0	0.048951	0.0288901	-1.34482	down
Olfr1417	15	11	23	15	43	37	45	36	0.220385	0.225088	0.18457	0.219293	0.586888	0.262588	0.749456	0.448702	1.91e-05	1.39751	up
Btn1a1	13	8	7	4	10	14	29	21	0.071736	0.059548	0.044704	0.01828	0.054831	0.091858	0.186868	0.26061	0.0221579	1.25902	up
Myh11	557	480	461	695	406	193	502	289	1.72939	2.02449	1.5579	1.74102	1.24038	0.672921	1.71134	1.08093	0.00602202	-0.588753	down
Crybg2	5	6	12	9	17	29	16	8	0.01559	0.029035	0.046382	0.025597	0.058629	0.115479	0.061768	0.033697	0.020355	1.18902	up
Gm45140	36	35	13	200	342	160	102	175	0.301861	0.211201	0.074642	0.628883	1.30491	0.717878	0.449359	0.845368	0.001616	1.67835	up
Gipc3	83	59	67	124	47	28	65	49	0.470018	0.456727	0.413675	0.55764	0.253211	0.175342	0.40591	0.34044	0.0111404	-0.700732	down
Dytn	7	2	8	6	2	2	2	0	0.051069	0.020518	0.068324	0.033661	0.015934	0.018731	0.018185	0	0.0250774	-1.77158	down
Tulp2	1	5	0	0	7	4	8	11	0.012031	0.056426	0	0	0.062064	0.033823	0.077523	0.129458	0.0167015	2.21276	up
Wdr63	60	46	71	37	37	18	34	29	0.373629	0.38626	0.488425	0.185448	0.219529	0.125744	0.233737	0.219955	0.0178919	-0.826421	down
Gm3327	3	0	0	6	0	0	0	0	0.028925	0	0	0.068529	0	0	0	0	0.0470583	-4.06097	down
Dsc1	2	2	5	4	0	2	0	0	0.009835	0.012858	0.021405	0.015552	0	0.011054	0	0	0.033136	-2.34967	down
Sgk1	5131	2563	3041	3518	13647	10953	9852	9982	40.1218	27.5331	25.7976	21.6524	103.152	97.9599	84.8703	96.2404	5.75e-31	1.71243	up
Dmbx1	12	8	8	37	29	43	29	19	0.041154	0.036898	0.030082	0.101638	0.10081	0.168073	0.109796	0.079895	0.0184334	1.05439	up
Zfp961	228	86	226	140	220	423	198	388	2.54107	1.34864	2.13187	1.78329	2.03588	3.70765	2.25898	3.71619	0.002686	0.965301	up
Zfp965	135	143	120	147	6	103	19	91	2.32646	3.43667	2.05856	1.83559	0.088194	1.83811	0.524902	1.75156	0.0458671	-1.1917	down
Gm5795	0	0	0	0	0	4	0	5	0	0	0	0	0	0.050899	0	0.056425	0.0319805	4.36559	up
Mill2	149	154	99	230	87	56	114	91	0.894253	1.43199	0.875868	1.39909	0.817042	0.550275	0.617532	0.590063	0.00375063	-0.767947	down
Pik3r6	80	86	86	142	55	64	64	52	0.492826	0.723884	0.580574	0.695767	0.322669	0.445849	0.435995	0.388961	0.00454222	-0.648158	down
Tcf7	123	124	151	187	99	70	105	87	1.02978	1.38781	1.36568	1.24078	0.780915	0.817999	0.964131	0.881771	0.00237471	-0.616149	down
Gm44790	0	0	22	0	0	0	0	0	0	0	0.601283	0	0	0	0	0	0.00516147	-5.52708	down
Arrdc2	1065	636	753	1017	1716	1828	1302	1227	9.07629	7.35667	6.9881	6.88047	14.0825	17.6357	12.3302	12.7982	1.11e-10	0.893076	up
Trappc3l	9	6	9	8	3	0	4	3	0.19698	0.126807	0.233758	0.179606	0.080095	0	0.064131	0.106686	0.0148172	-1.55904	down
Cd52	24	24	27	33	70	14	66	43	0.899684	1.26972	1.10577	1.01792	2.63254	0.617922	2.83351	2.0465	0.0313814	0.887784	up
Hoga1	43	31	45	44	64	67	56	54	0.685901	0.668793	0.654624	0.563547	0.811489	1.06832	0.976313	0.84454	0.00932929	0.642459	up
Sumo3	1284	2677	1188	2875	3761	3156	3481	3121	10.8251	28.6532	11.3912	25.5968	28.156	28.3048	30.4444	30.1224	0.000989975	0.795076	up
Tbx19	0	0	0	0	0	0	3	5	0	0	0	0	0	0	0.016592	0.036952	0.0405144	4.1949	up
Gm50457	9	2	4	2	0	0	0	0	0.164998	0.055978	0.089775	0.029558	0	0	0	0	0.000782998	-5.10582	down
Klrd1	0	0	0	0	8	3	4	11	0	0	0	0	0.165489	0.049467	0.096158	0.28611	1.36e-05	5.78524	up
Plbd1	0	0	0	0	6	3	3	0	0	0	0	0	0.054366	0.022617	0.032863	0	0.00613422	4.64355	up
Emilin1	64	34	33	83	33	16	28	28	0.330069	0.24053	0.186973	0.343225	0.164347	0.094216	0.160137	0.172328	0.00532134	-0.902291	down
Pars2	65	103	68	116	131	137	86	173	0.778261	1.32328	1.49918	0.939706	1.1467	1.68338	0.87962	1.39	0.0256632	0.656456	up
Gm10591	25	19	11	7	21	44	28	32	0.57359	0.574695	0.27013	0.112957	0.450058	1.1436	0.689526	0.88433	0.0378338	1.04127	up
Cbr2	19	6	8	8	6	5	0	0	0.342289	0.144903	0.137857	0.113627	0.103473	0.099657	0	0	0.0239915	-1.80991	down
Pmch	0	0	0	0	3	12	0	0	0	0	0	0	0.077447	0.345397	0	0	0.014293	5.00292	up
Gm49333	0	0	18	0	0	0	0	0	0	0	0.113212	0	0	0	0	0	0.00888524	-5.2434	down
Gm11549	0	0	0	3	6	3	3	7	0	0	0	0.011266	0.040918	0.016069	0.015601	0.052117	0.00436293	2.62589	up
Mtnr1a	2	0	0	2	8	4	5	0	0.018829	0	0	0.020155	0.088851	0.056813	0.07001	0	0.0369792	2.04786	up
1700001C19Rik	2	3	2	3	0	0	1	0	0.014862	0.033615	0.026685	0.019649	0	0	0.007981	0	0.0331626	-2.75605	down
Idi2	3	3	9	0	0	0	0	0	0.017833	0.0242	0.086451	0	0	0	0	0	0.00308143	-5.01094	down
Ibsp	16	8	4	6	0	4	4	3	0.150124	0.105372	0.040028	0.046183	0	0.043965	0.042683	0.023765	0.0491753	-1.50586	down
Mei4	24	19	16	16	4	10	8	11	0.179768	0.193654	0.12983	0.104212	0.028968	0.084826	0.060447	0.101238	0.0227531	-1.10047	down
Gm26965	0	0	0	0	0	0	0	21	0	0	0	0	0	0	0	0.329757	0.00456451	5.60145	up
Hspa1b	431	382	637	1143	471	346	352	184	3.08325	3.70963	4.96184	6.49282	3.24278	2.80032	2.76682	1.60566	0.000503736	-0.819539	down
Sp9	55	26	67	94	44	32	32	37	0.243608	0.153962	0.32143	0.330992	0.187414	0.159845	0.156043	0.200881	0.0428447	-0.605682	down
Tbr1	9	9	4	12	4	3	3	0	0.043581	0.057277	0.021987	0.048083	0.019448	0.011431	0.011097	0	0.0123209	-1.65081	down
Akr1c14	144	94	85	174	61	67	99	66	1.16833	1.03168	0.760322	1.12714	0.36735	0.477984	0.888297	0.651538	0.00838515	-0.64847	down
Ms4a4c	4	0	0	0	5	2	5	10	0.045082	0	0	0	0.044889	0.02534	0.051229	0.178164	0.0207107	2.43149	up
Dlgap5	6	11	10	13	10	20	16	28	0.0372	0.073223	0.048907	0.047435	0.052469	0.111394	0.083299	0.310759	0.0443393	0.982419	up
Cacng6	2	4	13	2	2	0	2	0	0.01627	0.055157	0.292843	0.016121	0.019561	0	0.022324	0	0.0413871	-2.28516	down
Plekhf1	544	367	412	690	839	785	705	691	2.07371	1.8992	1.71116	2.08806	3.08223	3.38629	2.95214	3.22484	9.97e-09	0.688191	up
Mpo	0	0	2	1	21	10	2	3	0	0	0.011839	0.005106	0.170473	0.078905	0.014298	0.026568	0.00122604	3.41313	up
Fgf22	174	89	54	93	231	191	145	110	2.69428	1.46288	0.754236	0.884511	2.68235	3.11524	2.76076	1.49794	0.0133563	0.770155	up
Nme3	206	146	200	216	343	303	233	338	5.77824	5.55899	6.09702	4.80035	9.26216	9.62465	7.16821	11.5924	2.74e-05	0.748608	up
Stpg3	0	0	0	0	6	4	2	5	0	0	0	0	0.072585	0.06358	0.030863	0.076318	0.000290829	5.17187	up
4933411K16Rik	11	6	10	7	27	19	18	20	0.150615	0.103909	0.148058	0.074365	0.364299	0.3113	0.279942	0.355898	0.000776371	1.36219	up
Tsks	5	3	3	9	10	14	12	17	0.045126	0.029828	0.026926	0.069756	0.174631	0.168927	0.132192	0.225392	0.00200149	1.51497	up
Gm36864	3	2	2	2	4	5	9	7	0.030143	0.024161	0.03409	0.03054	0.03969	0.065145	0.117455	0.107771	0.0326543	1.51271	up
Gm20489	2	1	5	0	0	0	0	0	0.023491	0.018402	0.073623	0	0	0	0	0	0.035506	-4.11183	down
She	325	228	228	492	209	153	254	162	1.13696	1.08345	0.867596	1.36507	0.702451	0.603783	0.976497	0.691764	0.00249757	-0.594542	down
Olfr859	0	0	0	0	0	8	4	2	0	0	0	0	0	0.018886	0.009198	0.052318	0.00391918	4.93788	up
Cdc25c	8	2	4	13	2	0	3	0	0.072563	0.02562	0.041226	0.093654	0.011934	0	0.020808	0	0.0132023	-2.18153	down
A930018P22Rik	4	0	4	0	0	0	0	0	0.097754	0	0.106376	0	0	0	0	0	0.0484836	-4.07404	down
Cxcl12	4491	3257	2155	5587	2347	1527	2820	1637	17.4892	17.5258	9.9209	18.3125	9.23544	7.17267	12.2019	8.43601	4.06e-05	-0.799936	down
H4c4	12	1	9	14	6	0	2	1	0.209476	0.023955	0.153675	0.182039	0.101947	0	0.038782	0.013676	0.02582	-1.82732	down
Nes	860	689	813	1379	593	432	634	473	2.8183	3.06596	2.92383	3.58657	1.86886	1.60106	2.28076	1.89409	1.37e-07	-0.705708	down
Slc22a8	776	521	517	966	537	367	450	357	4.52492	4.12549	3.27571	4.46684	3.01248	2.41254	2.87284	2.5455	1.9e-05	-0.605427	down
Oasl2	171	150	198	282	397	308	486	385	1.2712	1.45994	1.41381	1.66884	2.4695	2.38066	3.44688	3.05382	9.31e-10	1.07835	up
Nt5el	2	0	4	4	0	0	0	0	0.018626	0	0.040538	0.022804	0	0	0	0	0.0183415	-4.30128	down
Usp9y	94	0	0	2	0	0	0	0	0.231917	0	0	0.003938	0	0	0	0	7.64e-05	-7.5152	down
Olfr267	2	0	6	2	0	0	0	0	0.00992	0	0.10282	0.007869	0	0	0	0	0.0173793	-4.34781	down
H3c3	8	0	7	5	0	1	0	1	0.232772	0	0.232713	0.101177	0	0.017799	0	0.033024	0.00966736	-2.90268	down
Inka2	457	324	428	492	343	222	297	184	2.38307	2.1307	2.23814	1.66671	1.68755	1.31816	2.52757	0.958018	8.33e-05	-0.63682	down
Nxf3	0	0	0	0	8	0	0	2	0	0	0	0	0.046671	0	0	0.0158	0.0353466	4.35772	up
Dmrta1	79	51	78	115	129	149	143	85	0.387094	0.335014	0.413338	0.44704	0.609483	0.825868	0.769758	0.50767	0.000667293	0.753076	up
Tgfbr3l	43	29	59	76	71	113	87	40	0.796211	0.727222	1.18487	1.12048	1.26461	2.37654	1.78303	0.902847	0.0292244	0.700526	up
H4c9	56	52	80	137	69	28	44	54	1.54611	1.94992	2.40533	2.99177	1.83465	0.855418	1.33556	1.82458	0.0440259	-0.617052	down
Actl9	23	7	12	27	11	4	3	6	0.321884	0.119132	0.182779	0.31244	0.154068	0.06622	0.032144	0.092278	0.00692524	-1.38212	down
Gm3526	0	0	0	0	4	0	0	8	0	0	0	0	0.043756	0	0	0.100915	0.0176719	4.72324	up
Cdc14b	680	200	255	844	765	652	681	715	3.9776	3.38422	3.28033	4.0189	4.20734	4.53803	5.20659	5.51234	0.00753236	0.687796	up
Tmem52	90	33	44	66	73	86	105	88	1.89412	0.925672	1.00994	1.10969	1.48767	2.03021	2.45325	2.26498	0.0114495	0.710633	up
Gata6	5	0	5	5	0	0	0	0	0.024847	0	0.064608	0.01971	0	0	0	0	0.00248739	-4.86408	down
Tbx21	0	0	3	0	0	8	10	3	0	0	0.017573	0	0	0.073086	0.081539	0.019754	0.0357942	2.69413	up
Zp3	0	0	2	11	0	0	0	0	0	0	0.033046	0.129076	0	0	0	0	0.0267646	-4.51127	down
Chil3	0	4	5	5	41	2	11	7	0	0.068375	0.056817	0.041418	0.511101	0.02944	0.155239	0.107338	0.0199466	2.05729	up
Hnrnpa3	908	922	1044	1336	1160	1214	825	5746	11.0053	15.1843	13.7871	12.8693	13.5569	16.648	11.0041	27.4159	0.00701637	1.24509	up
Armc3	57	26	49	55	30	33	36	12	0.400841	0.247233	0.378145	0.305459	0.202585	0.260303	0.280134	0.100485	0.0489496	-0.660226	down
Trip13	34	23	20	52	26	17	18	13	0.197516	0.181525	0.126259	0.24193	0.144546	0.111656	0.116817	0.093213	0.0470953	-0.692891	down
Ripply3	14	9	6	18	2	0	0	2	0.182909	0.15948	0.073733	0.186328	0.025259	0	0	0.032101	4.8e-06	-3.29766	down
Gm21987	0	0	0	0	6	0	4	8	0	0	0	0	0.25305	0	0.181361	0.425999	0.00126045	5.26292	up
Gm21985	577	468	341	577	255	97	54	293	2.55667	2.8119	1.64348	2.02882	1.08434	0.486411	0.258234	1.5849	0.000228799	-1.412	down
Pet117	1	75	1	1	1	1	1	1	1e-06	2.92847	2e-06	1e-06	5e-06	5e-06	9e-06	1e-06	0.00217471	-4.40403	down
Calca	1502	1289	2180	1919	1144	832	1144	1114	31.9768	38.7889	50.1384	32.384	23.8816	20.4471	26.6042	29.6254	4.29e-05	-0.626936	down
Atf7ip2	5	2	0	4	0	0	0	0	0.028925	0.019627	0	0.021331	0	0	0	0	0.0130617	-4.45555	down
Col6a4	57	38	28	79	69	103	106	76	0.168976	0.332329	0.080552	0.341267	0.316802	0.315842	0.384973	0.675062	0.00106987	0.935876	up
Lrrn4cl	50	29	39	46	73	55	61	87	0.382267	0.326461	0.339999	0.282884	0.544519	0.483402	0.52028	0.819422	0.00166932	0.845312	up
Trim14	17	16	18	37	42	30	46	27	0.192596	0.300013	0.271599	0.307504	0.506529	0.402662	0.655343	0.369042	0.0115713	0.822083	up
Hic1	166	188	156	320	127	112	123	66	0.950255	1.45815	0.974636	1.45543	0.700781	0.723906	0.774144	0.456848	0.000156019	-0.869656	down
Mall	35	37	50	68	30	10	20	36	0.348027	0.495941	0.54429	0.538487	0.289042	0.110192	0.216661	0.435281	0.0196397	-0.879837	down
Aldh3b3	9	4	4	12	0	0	6	0	0.04255	0.019672	0.021273	0.047545	0	0	0.032847	0	0.0301867	-2.04605	down
Htra4	6	2	4	14	14	12	29	5	0.054368	0.02476	0.038848	0.099414	0.12388	0.120423	0.284644	0.048922	0.0251969	1.34365	up
Gm45208	0	0	0	0	19	0	0	0	0	0	0	0	0.482787	0	0	0	0.0103333	5.18034	up
Fcho2	1226	1982	2382	3433	1258	946	940	2161	5.48537	10.9666	10.712	11.1769	5.41663	4.70502	4.45246	10.998	0.0197507	-0.644762	down
Col4a3bp	6002	4901	5857	5594	4181	3289	3762	2807	25.9536	28.0346	26.9406	21.3507	20.7675	18.69	20.5474	17.4687	1.83e-07	-0.625155	down
Ggnbp1	98	130	72	87	205	155	186	152	3.03659	4.14502	2.7385	2.27391	4.21474	3.92516	3.69363	4.19266	0.00128242	0.859667	up
Slc6a19	31	19	19	22	31	50	43	28	0.156414	0.130255	0.099971	0.086489	0.151045	0.283605	0.235703	0.172147	0.0184852	0.815719	up
Nuggc	4	0	3	0	15	5	2	10	0.029273	0	0.015927	0	0.103403	0.03738	0.008944	0.088864	0.0179491	2.16404	up
4930412O13Rik	2	4	4	0	0	0	0	0	0.044525	0.071132	0.085299	0	0	0	0	0	0.0104369	-4.47257	down
Gtse1	38	14	20	41	44	36	42	43	0.282628	0.141573	0.161867	0.243653	0.319527	0.298578	0.341607	0.387648	0.0270825	0.668841	up
Ifi204	6	6	21	20	57	24	54	29	0.048121	0.064718	0.193961	0.136856	0.474302	0.235614	0.51168	0.307096	0.000119394	1.71013	up
Tie1	819	671	519	980	565	408	524	369	4.01265	4.46294	2.76783	3.75545	2.66378	2.25734	2.77655	2.21346	8.7e-05	-0.605342	down
Ccl9	38	18	19	78	103	54	70	58	0.253456	0.162274	0.135138	0.413245	0.657223	0.408018	0.513772	0.468251	0.00252097	1.04909	up
3425401B19Rik	26	21	19	18	15	11	15	6	0.091259	0.103109	0.073459	0.050806	0.050456	0.044634	0.059218	0.026462	0.0497983	-0.792327	down
Fhl4	24	10	6	34	26	26	33	41	0.140104	0.080133	0.038554	0.159229	0.142206	0.172073	0.212368	0.462633	0.0282764	0.93561	up
Ifi27l2b	0	0	0	0	2	3	3	0	0	0	0	0	0.034037	0.045025	0.04289	0	0.0285073	4.11887	up
Ifi27l2a	8	21	5	11	52	21	57	53	0.34392	1.21712	0.194401	0.369875	2.16384	0.981959	2.7081	2.80869	7.37e-05	2.01637	up
Mageb3	2	2	0	0	4	4	4	5	0.017162	0.02329	0	0	0.032929	0.03845	0.037643	0.041988	0.0311326	2.01371	up
Itgad	31	11	14	29	23	94	37	35	0.150225	0.067081	0.071687	0.18059	0.283988	0.686611	0.302424	0.213713	0.0059637	1.30071	up
Itgae	33	27	17	53	62	35	48	46	0.168858	0.189885	0.09596	0.218573	0.310762	0.204029	0.273931	0.290341	0.0322448	0.657346	up
Kcne3	3	0	7	2	0	0	0	0	0.045552	0	0.110275	0.013128	0	0	0	0	0.0123189	-4.60352	down
Shroom4	526	308	368	564	344	97	413	151	1.4788	1.03432	0.985934	1.09437	0.81105	0.452586	1.1275	0.741319	0.0157454	-0.741846	down
Tm4sf5	0	0	0	2	3	3	17	6	0	0	0	0.031871	0.053424	0.068038	0.354838	0.145474	0.000272048	3.71688	up
Obscn	61	39	32	70	33	22	34	30	0.045745	0.040309	0.025457	0.041527	0.023686	0.063134	0.027797	0.02762	0.0263196	-0.659271	down
Ptpre	2113	691	865	1114	2266	1736	1818	1684	7.84027	4.39344	4.13926	3.92164	8.09275	7.28901	7.4128	7.64365	0.000738208	0.73866	up
Slc27a6	27	27	19	63	24	19	19	10	0.216775	0.293933	0.163688	0.399135	0.186126	0.173745	0.162604	0.09615	0.0408922	-0.798937	down
Tmc2	0	0	0	0	4	0	2	2	0	0	0	0	0.019527	0	0.008196	0.00886	0.0294556	4.10561	up
Rnase6	12	6	14	17	33	33	29	28	0.097211	0.066634	0.123803	0.110352	0.46786	0.602309	0.461321	0.280609	2.51e-05	1.42261	up
Cd177	0	0	0	3	12	4	0	3	0	0	0	0.011743	0.084117	0.032673	0	0.018109	0.0258654	2.61613	up
Gm21586	0	0	0	0	15	0	0	0	0	0	0	0	0.737163	0	0	0	0.0170261	4.85553	up
Erbb2	109	79	127	159	72	85	87	42	0.434615	0.428545	0.550016	0.503157	0.274382	0.382389	0.382472	0.204124	0.00842749	-0.632261	down
Cldn22	0	3	7	0	0	0	0	0	0	0.082195	0.142806	0	0	0	0	0	0.0272321	-4.49028	down
Gpr35	4	7	5	9	15	12	15	9	0.114453	0.525883	0.133845	0.339513	0.41188	0.4455	0.214901	0.331329	0.0196792	1.08974	up
Elane	0	0	0	0	18	0	0	4	0	0	0	0	0.352395	0	0	0.096728	0.00586427	5.43818	up
Pbk	12	10	13	10	4	3	3	4	0.138517	0.156277	0.160681	0.090387	0.044967	0.02643	0.025659	0.055781	0.00268499	-1.58807	down
Trim2	14033	8046	6181	13186	22692	11584	21110	8377	47.7217	39.371	20.382	36.6507	74.0029	44.1427	86.1895	30.4206	0.00315179	0.687382	up
Dnah6	406	217	383	378	171	219	249	172	0.643528	0.466796	0.660047	0.474854	0.260831	0.39344	0.433194	0.333142	0.000582805	-0.67377	down
Dnah5	408	297	347	503	289	241	236	201	0.523904	0.516767	0.48396	0.512336	0.356499	0.349479	0.332804	0.315388	1.16e-05	-0.598414	down
Gm3173	14	12	27	31	62	23	49	70	0.536085	0.582229	1.10507	0.941478	2.28876	0.990508	2.06162	3.27015	0.000462565	1.38961	up
Duxbl1	68	55	45	109	145	101	80	110	0.708224	0.761163	0.618363	0.828675	1.45323	1.18422	0.89178	1.29768	0.0020636	0.758691	up
Ptx4	35	8	18	11	14	6	4	7	0.437664	0.135582	0.233342	0.137133	0.161038	0.089421	0.051151	0.108526	0.0445842	-1.14664	down
Rhbdf2	117	66	53	149	73	45	74	34	0.612041	0.470203	0.297121	0.657698	0.361832	0.262931	0.420111	0.205712	0.0281596	-0.659994	down
Gm27027	4	0	0	0	6	19	3	2	0.113468	0	0	0	0.201114	0.773669	0.084939	0.081265	0.0134525	2.85217	up
Rsph6a	0	0	3	0	7	0	11	5	0	0	0.02724	0	0.051199	0	0.095339	0.047751	0.0250501	2.77714	up
Gm49527	150	38	83	147	778	107	76	43	2.17311	0.733932	1.29709	1.6833	10.8681	1.75044	1.2113	0.751383	0.0365231	1.28922	up
Gm17093	0	0	4	6	0	0	0	0	0	0	0.052499	0.067268	0	0	0	0	0.0352827	-4.24612	down
Pou2f2	126	61	151	370	137	69	73	60	1.47807	1.14423	1.28153	1.38932	1.00524	0.944559	1.02017	0.892469	0.0097317	-0.891467	down
Pou2f3	10	24	8	11	3	4	7	4	0.076403	0.249335	0.058629	0.066428	0.014817	0.034835	0.050729	0.037472	0.0162909	-1.54061	down
Fbxo43	2	7	9	5	16	19	10	10	0.009957	0.047248	0.043341	0.015797	0.076035	0.106434	0.052053	0.059723	0.0186587	1.27973	up
Tbx3	172	160	163	368	114	72	160	92	0.692232	0.889444	0.707205	1.18381	0.438877	0.325741	0.717128	0.463601	0.000941927	-0.854755	down
Tmigd3	8	2	9	5	2	2	1	1	0.153625	0.04868	0.195233	0.073238	0.032637	0.049332	0.015141	0.02603	0.0197869	-1.83575	down
Bcl6b	122	85	93	156	70	38	64	39	0.724404	0.687123	0.603938	0.734845	0.400962	0.250448	0.419194	0.281506	9.44e-06	-1.02334	down
Lars2	3075	2670	2823	3312	811	701	716	2479	16.3455	18.6831	15.9812	13.8085	4.09981	4.11094	4.06559	15.8016	0.000361064	-1.21418	down
Sox17	304	235	255	392	187	102	197	160	3.35012	2.97838	3.16873	3.33492	1.56615	1.12315	1.73734	1.76547	4.78e-05	-0.787025	down
Eng	1096	1058	912	1871	855	507	1018	607	6.8557	9.23202	6.24632	9.14052	4.95163	3.73501	6.98944	4.44197	0.00058877	-0.632427	down
Sox3	114	50	93	135	67	61	52	51	1.10323	0.659906	0.980129	1.03674	0.626364	0.668284	0.552691	0.602851	0.00631987	-0.644931	down
Was	30	34	9	35	55	50	63	22	0.280461	0.430968	0.092859	0.260815	0.494156	0.53302	0.656942	0.246444	0.0424837	0.855555	up
Tbxa2r	40	37	28	76	33	28	26	15	0.451849	0.545104	0.342578	0.630052	0.329889	0.346278	0.295607	0.195937	0.0293584	-0.721923	down
Acta2	352	323	292	522	262	160	316	163	3.5663	4.31989	3.22733	4.08415	2.65686	1.87332	3.41679	1.9608	0.00170703	-0.645296	down
Acta1	43	19	21	41	13	17	20	8	0.57636	0.364789	0.311022	0.445797	0.166704	0.257979	0.295829	0.137747	0.0110515	-0.980973	down
Neil3	2	0	0	0	3	0	4	14	0.017653	0	0	0	0.017165	0	0.03859	0.143535	0.0205296	3.24828	up
Ccl24	2	4	0	2	0	0	0	0	0.027744	0.084205	0	0.024611	0	0	0	0	0.0339764	-4.11829	down
Fcrl1	9	2	8	0	11	5	14	21	0.081166	0.027537	0.083761	0	0.101628	0.049514	0.154692	0.25747	0.0461621	1.46516	up
Ddx60	35	38	33	37	89	68	89	98	0.105377	0.156687	0.109948	0.089772	0.289169	0.342364	0.305357	0.365555	7.32e-07	1.32882	up
Dnah12	217	141	187	247	58	73	140	92	0.410833	0.319379	0.338719	0.327331	0.093223	0.137882	0.257002	0.186649	0.000116648	-1.01253	down
Slc38a11	114	74	75	130	58	47	63	49	1.438	1.27246	1.03495	1.29281	0.702821	0.646795	0.890029	0.741704	0.000635954	-0.758422	down
Foxl2	76	51	50	70	40	39	35	15	0.46865	0.426112	0.335512	0.34246	0.237185	0.266857	0.232237	0.112754	0.00359088	-0.869835	down
Soat2	0	0	0	0	0	9	0	0	0	0	0	0	0	0.092649	0	0	0.0485981	4.3269	up
Majin	13	0	0	9	0	0	0	0	0.154329	0	0	0.103227	0	0	0	0	0.00532537	-5.32565	down
Commd1b	1	0	1	26	859	0	1	0	0.002787	0	0.007569	0.150832	6.04733	0	0.004004	0	0.000226448	5.09933	up
Pter	347	188	211	308	432	340	833	630	2.28209	1.7441	1.70836	1.85148	2.67573	2.42032	5.49787	4.55067	2.42e-06	1.19407	up
Vkorc1l1	4907	3396	4227	6123	2248	2678	1588	2551	26.7584	24.9522	25.304	26.9119	10.1684	17.4772	10.6839	17.217	6.14e-10	-0.927637	down
Dusp27	4	0	7	2	13	5	10	6	0.019865	0	0.032426	0.007605	0.057362	0.028096	0.054445	0.036369	0.0387241	1.41658	up
Plin4	247	181	219	348	529	843	546	667	0.77654	0.774031	0.753277	0.872371	1.60822	3.06997	1.89434	2.58107	9.44e-16	1.50017	up
Thegl	5	3	2	3	0	0	0	2	0.052042	0.047577	0.025434	0.042722	0	0	0	0.02859	0.0329881	-2.35173	down
Ap5b1	294	228	305	370	105	215	171	195	2.04485	2.13126	2.38152	2.03438	0.901395	1.66783	1.52663	1.63992	0.00312529	-0.687825	down
Tdrd9	35	23	31	44	46	36	65	40	0.143487	0.13033	0.138335	0.145285	0.181438	0.165749	0.296553	0.203872	0.0405005	0.58749	up
Glcci1	2246	1326	1457	2244	1178	1021	674	1280	7.84716	6.48622	5.86211	6.23505	4.44634	4.4068	3.73372	5.80933	7.62e-05	-0.701929	down
Cldn5	2039	1417	1688	2615	1321	832	1403	707	28.9152	27.275	26.0458	29.4265	18.0366	13.3543	21.8636	12.2564	5.36e-07	-0.78038	down
Nrros	175	179	147	202	255	304	296	225	1.36467	1.88694	1.25348	1.25005	1.97799	2.68771	2.54426	2.15458	0.000343068	0.683888	up
Vmn2r31	6	5	0	0	0	0	0	0	0.014172	0.012988	0	0	0	0	0	0	0.0206085	-4.61611	down
Ccdc36	20	17	24	38	34	47	36	29	0.137163	0.160172	0.177929	0.204372	0.223652	0.363467	0.269233	0.242106	0.0286455	0.668596	up
Lmx1a	4	3	0	8	0	0	2	0	0.024008	0.024272	0	0.038089	0	0	0.012439	0	0.0461383	-2.49206	down
Troap	0	3	4	10	0	0	0	2	0	0.029678	0.030318	0.054643	0	0	0	0.012087	0.034231	-2.6287	down
Rhcg	6	0	5	4	0	0	0	1	0.057414	0	0.049214	0.030498	0	0	0	0.009887	0.0131963	-3.24507	down
Dmgdh	29	23	21	39	38	42	39	39	0.189542	0.209079	0.14819	0.20699	0.241899	0.317572	0.286104	0.312246	0.0354492	0.595184	up
Pcdh12	51	39	41	93	22	10	20	10	0.184126	0.190511	0.161186	0.27387	0.076702	0.040984	0.079525	0.0437	2.73e-07	-1.73651	down
Diaph2	352	237	312	349	888	606	285	328	1.56013	1.45305	1.17014	1.27858	2.05455	1.67041	1.52153	1.04446	0.00163411	0.797566	up
Catspere1	0	2	0	0	2	8	3	2	0	0.013774	0	0	0.007993	0.052805	0.01606	0.010634	0.0264147	2.65375	up
Rskr	67	46	86	65	126	91	137	123	1.03838	0.88966	1.39579	0.6885	1.8612	1.44814	2.39655	2.20034	0.00014141	0.927051	up
Fam181a	141	104	135	151	78	58	101	65	2.00603	2.00099	2.07247	1.81575	1.05036	1.03766	2.05107	1.68729	0.000677325	-0.736617	down
Bhlha9	24	21	18	23	40	24	40	26	0.390231	0.452323	0.32576	0.301896	0.634491	0.441666	0.73118	0.521192	0.0458208	0.653722	up
Fam83g	3	2	0	3	10	6	3	5	0.008409	0.011335	0	0.00667	0.039386	0.028543	0.009237	0.020572	0.0414988	1.60446	up
Krt2	0	0	0	0	8	7	0	0	0	0	0	0	0.059051	0.052193	0	0	0.0105645	4.94417	up
Zscan2	50	26	35	73	46	139	111	98	1.08156	0.897456	0.862435	1.33129	1.15802	2.08731	1.63779	1.89143	0.000366142	1.26153	up
Fbxo34	1465	577	556	810	754	219	301	131	10.5827	5.57846	4.54518	4.64428	5.09168	1.76519	2.80654	1.72152	0.00055672	-1.26257	down
Hhla1	0	0	0	0	2	0	3	2	0	0	0	0	0.015773	0	0.019511	0.022148	0.0445012	3.94769	up
Oxgr1	2	0	0	7	7	7	12	3	0.01073	0	0	0.02562	0.031087	0.036543	0.070955	0.013169	0.0215458	1.82276	up
Steap1	14	14	5	20	5	4	4	0	0.224103	0.302228	0.07109	0.247841	0.071528	0.065555	0.069131	0	0.00222278	-1.91839	down
Sytl3	7	0	0	5	4	12	9	9	0.057317	0	0	0.031963	0.04988	0.109437	0.0755	0.083764	0.0338889	1.6547	up
Slc4a7	1451	1062	691	2077	721	600	645	606	3.89347	4.23473	3.53853	4.1928	3.01567	3.16662	3.28598	3.68038	6.19e-07	-0.919798	down
4930486L24Rik	0	0	0	0	1	7	0	3	0	0	0	0	0.009542	0.099448	0	0.038553	0.0123696	4.60704	up
Itprip	54	29	25	64	31	17	27	25	0.288434	0.209294	0.144902	0.271156	0.158969	0.102728	0.158304	0.156851	0.0427875	-0.666555	down
Smim5	134	88	134	153	86	84	52	86	3.14599	2.71868	3.44895	2.69191	2.05461	2.09767	1.20004	2.5657	0.00529376	-0.627974	down
Gm4631	0	1	0	0	3	89	426	76	0	0.00218	0	0	0.009729	0.455163	2.2161	0.41985	4.99e-11	8.67794	up
Mob4	1269	794	3147	2388	1041	969	1041	806	9.59274	8.33795	24.5301	13.7499	7.71012	8.34829	8.65253	7.65656	0.000720464	-0.869904	down
Tktl2	0	4	7	3	16	10	14	13	0	0.019848	0.023966	0.005811	0.05573	0.055618	0.056271	0.073599	0.00102483	1.93192	up
Kif18b	8	9	6	4	2	0	0	3	0.047836	0.072129	0.038512	0.018941	0.011627	0	0	0.022116	0.00547948	-2.30706	down
Kdr	1652	1192	924	1935	830	632	1066	631	5.6017	5.48171	3.40806	5.20374	2.70729	2.42288	3.97081	2.61335	1.5e-05	-0.760862	down
Olfr1366	22	5	8	8	3	0	4	2	0.136062	0.040255	0.055915	0.038963	0.036691	0	0.028364	0.013051	0.00422389	-2.11751	down
Stbd1	96	78	157	135	88	62	70	59	0.971332	1.06995	1.8567	1.10078	0.856819	0.708882	0.776292	0.728742	0.00520975	-0.66534	down
Kpna1	2755	5544	2185	3347	8005	7094	7179	6312	11.7405	30.3767	10.1467	16.295	31.0567	32.7235	32.1987	31.579	0.000121385	1.02547	up
Ccdc60	37	23	20	49	59	51	47	49	0.206682	0.177614	0.123887	0.217725	0.325145	0.323157	0.29366	0.338436	0.00394678	0.782874	up
Gm6133	1	0	8	4	15	11	5	7	0.005298	0	0.172945	0.067238	0.290174	0.253353	0.107852	0.180758	0.0302874	1.59728	up
Btbd6	265	200	878	234	894	709	334	735	4.21345	5.86639	9.75113	2.6173	9.74189	8.61319	4.10588	9.60854	0.0467546	0.795917	up
Fmr1nb	0	0	0	0	0	10	0	0	0	0	0	0	0	0.281824	0	0	0.0382996	4.47248	up
1700123L14Rik	12	5	3	13	3	0	0	4	0.133463	0.069389	0.025026	0.109459	0.029515	0	0	0.055889	0.0117645	-2.02868	down
Pramel1	5	0	0	5	0	0	0	0	0.02876	0	0	0.022814	0	0	0	0	0.0345721	-4.23542	down
Spata31d1d	2	5	4	6	2	0	2	0	0.010498	0.028494	0.02281	0.024984	0.010105	0	0.011532	0	0.0376458	-1.91265	down
Zfp280d	1039	850	1026	1283	1694	1732	1525	1393	5.68308	8.73558	5.50956	5.93308	10.2678	10.7719	9.65045	8.82706	1.68e-10	0.67762	up
Lipg	0	3	2	2	11	2	4	12	0	0.020732	0.006646	0.008388	0.051059	0.012004	0.023153	0.077866	0.0164572	2.02159	up
Vmn2r21	6	8	0	0	0	0	0	0	0.047046	0.083896	0	0	0	0	0	0	0.0130605	-4.99941	down
Adtrp	0	0	0	0	5	0	6	0	0	0	0	0	0.031698	0	0.054143	0	0.0222712	4.51175	up
Myzap	33	13	18	19	25	53	42	19	0.288736	0.151734	0.169711	0.127867	0.211681	0.525563	0.397748	0.195141	0.0477442	0.83044	up
Marchf8	2524	1614	2067	3873	5568	5986	6476	5884	19.2186	18.3362	19.2983	22.9329	31.5483	38.563	40.4834	39.958	1.62e-27	1.38365	up
Mmrn2	279	175	187	382	167	97	211	149	1.40926	1.19774	1.02579	1.52818	0.811647	0.554119	1.17002	0.92114	0.0085624	-0.594856	down
Clec4a3	13	15	18	25	0	2	8	5	0.191273	0.312526	0.287882	0.331743	0	0.034736	0.135344	0.092691	0.00031609	-2.09618	down
Mindy4b-ps	13	13	23	22	32	30	23	23	0.189553	0.244765	0.520365	0.260305	0.450604	0.506973	0.359467	0.515942	0.0435123	0.683064	up
Nid2	293	232	170	324	179	125	175	126	1.20603	1.29668	0.758174	1.05756	0.708015	0.576987	0.789472	0.63035	0.00064085	-0.67753	down
Tesmin	14	9	7	14	10	4	1	2	0.110964	0.10313	0.058924	0.096044	0.079759	0.031022	0.00856	0.014824	0.0347169	-1.28861	down
Smim41	0	0	7	2	0	0	0	0	0	0	0.067366	0.01626	0	0	0	0	0.0457234	-4.21107	down
Srarp	136	98	68	136	101	32	73	31	3.01779	2.94122	1.63577	2.39459	2.14895	0.782945	1.7769	0.841196	0.0118557	-0.84284	down
Pirb	6	6	2	13	26	15	18	11	0.030012	0.036251	0.010938	0.051865	0.12878	0.088361	0.103529	0.064777	0.00250234	1.45284	up
Map3k15	63	36	62	60	71	92	89	65	0.288302	0.221544	0.309234	0.217188	0.314808	0.480736	0.449275	0.363821	0.013469	0.610131	up
Spib	0	0	0	0	0	0	6	4	0	0	0	0	0	0	0.04749	0.035256	0.0248636	4.48108	up
Ckmt2	2	0	1	0	5	8	9	0	0.017917	0	0.010668	0	0.058958	0.116963	0.120379	0	0.015244	2.74081	up
Gm26920	92	0	144	210	8	0	2	65	0.777918	0	1.32387	1.40646	0.064518	0	0.012628	0.668219	0.0402513	-2.23606	down
Msx3	0	0	0	0	5	6	0	0	0	0	0	0	0.032828	0.054899	0	0	0.0229676	4.53048	up
Ada	39	19	35	48	98	119	79	92	0.458439	0.303353	0.452631	0.452069	1.11907	1.59791	1.02544	1.33227	6.49e-10	1.57185	up
Rab7b	189	172	290	398	209	149	162	112	1.01772	1.34453	2.44949	1.60227	1.10516	1.06575	1.07288	1.05707	0.00243296	-0.632857	down
Zfp82	85	88	12	6	186	160	163	46	0.790398	1.1026	0.13763	0.045797	1.65182	1.67559	1.6556	0.510831	0.0399611	1.42246	up
Ifit3	282	231	474	402	515	434	546	472	3.24574	3.59524	5.93574	3.66794	5.69901	5.64809	6.89221	6.63759	0.00153284	0.586343	up
Adam28	6	0	0	8	0	0	0	0	0.038756	0	0	0.16386	0	0	0	0	0.0162355	-4.66954	down
Ifit1	139	115	179	183	292	219	312	290	1.04975	1.17154	1.46931	1.09576	2.12171	1.86911	2.58579	2.67994	3.88e-07	0.938556	up
Tnnt3	0	2	0	0	6	0	5	7	0	0.048173	0	0	0.107282	0	0.100484	0.155263	0.0204485	2.87776	up
Gm49711	2	0	4	6	0	0	1	0	0.03158	0	0.064901	0.075404	0	0	0.015539	0	0.0351111	-2.90972	down
Asmt	0	0	0	0	0	0	2	8	0	0	0	0	0	0	0.035164	0.150395	0.0306717	4.52671	up
Pln	46	34	51	46	32	19	23	28	0.39586	0.385444	0.477229	0.309768	0.264992	0.178243	0.208001	0.293814	0.0142596	-0.721614	down
Tlr7	27	33	117	112	86	129	105	130	0.14698	0.461505	0.673071	0.503037	0.465317	0.748719	0.64659	1.04596	0.0441085	0.785683	up
Cx3cl1	1962	1395	955	2175	1837	8371	1661	1354	14.1101	12.4652	8.03135	11.6369	11.9468	58.3206	12.4397	11.944	0.00897981	1.14272	up
Trpm3	4493	2840	3214	4257	8926	3293	7205	3097	18.0566	16.0673	13.9422	13.3648	17.2982	13.8886	15.5518	14.9065	0.00395726	0.647905	up
Gm44503	0	0	0	0	0	0	57	0	0	0	0	0	0	0	0.284122	0	0.000300277	6.89152	up
Rasgrp4	76	206	72	60	36	37	65	52	0.341164	1.21443	0.337439	0.216585	0.147988	0.181709	0.310014	0.271764	0.0115704	-1.18591	down
Trim29	22	10	29	22	43	37	27	31	0.154244	0.099676	0.231332	0.122394	0.299171	0.306263	0.217147	0.278049	0.0158865	0.815805	up
Tap1	160	111	151	202	254	182	225	217	1.08329	1.01666	1.11159	1.08727	1.78125	1.39402	1.68092	1.80255	0.000289784	0.586256	up
Vwce	19	17	12	26	32	34	26	25	0.079924	0.100664	0.055502	0.089422	0.133955	0.168173	0.123542	0.135149	0.0246931	0.747987	up
Kcnd3	421	274	351	384	465	607	710	528	1.83502	1.86598	1.88378	1.44821	2.36419	2.83721	3.06682	2.69798	5.62e-06	0.780126	up
Gm34066	0	0	0	0	2	0	2	6	0	0	0	0	0.046875	0	0.048456	0.162991	0.0178263	4.47275	up
Uts2	381	316	634	511	285	234	316	308	14.189	15.9786	25.7576	15.1114	10.2201	9.8765	12.9483	14.0434	0.00268996	-0.604354	down
Pck1	5	0	0	0	10	14	4	3	0.033921	0	0	0	0.072042	0.119529	0.033171	0.02635	0.0113562	2.58924	up
Arrb1	15016	5303	6320	17296	7680	6296	6261	5994	44.6251	23.3732	22.0988	40.2228	24.5359	22.5454	22.452	22.9533	0.00328119	-0.589391	down
Tcim	52	32	64	68	87	94	116	86	0.578133	0.478773	0.773727	0.597804	0.924052	1.18111	1.40976	1.15819	0.0001	0.92838	up
Myo15b	2	3	4	13	21	11	12	5	0.01408	0.005838	0.008482	0.021543	0.043426	0.026256	0.027293	0.010524	0.0359322	1.25268	up
Slc28a3	0	4	4	4	0	0	0	0	0	0.023837	0.019146	0.013957	0	0	0	0	0.00623723	-4.64405	down
Fam90a1b	11	3	4	8	3	0	4	0	0.075004	0.018552	0.029752	0.038388	0.013158	0	0.030033	0	0.0411443	-1.73427	down
Dnajb3	63	38	48	57	33	20	28	41	1.189	0.983588	0.997819	0.863431	0.606508	0.432538	0.587194	0.941316	0.0287392	-0.662405	down
Gm42669	16	8	16	8	123	3	104	9	0.092558	0.060269	0.099948	0.03639	0.765782	0.013196	0.72934	0.057064	0.00409933	2.27392	up
Gm2026	0	0	379	0	0	0	0	0	0	0	5.09895	0	0	0	0	0	6.96e-07	-9.60886	down
Gabrr1	9	0	0	14	0	0	0	0	0.077862	0	0	0.097592	0	0	0	0	0.00500911	-5.33478	down
Gabrr2	49	29	34	62	58	82	45	79	0.580861	0.510205	0.505049	0.629188	0.74436	0.999228	0.508107	1.03203	0.0128318	0.729137	up
Olfr560	3	5	0	3	0	0	0	0	0.014952	0.034648	0	0.009591	0	0	0	0	0.0105947	-4.54496	down
Prr29	6	0	0	12	0	0	0	0	0.090378	0	0	0.217838	0	0	0	0	0.00969184	-4.98424	down
Foxf2	231	161	181	355	121	89	143	124	1.95852	1.85573	1.66994	2.38952	0.983624	0.851993	1.32651	1.28645	4.22e-05	-0.836725	down
Bst2	85	69	92	97	154	97	165	110	2.15089	2.35233	2.52607	1.93237	3.74902	2.77025	4.58253	3.38649	0.001601	0.684197	up
Gm8206	32	24	34	22	62	45	52	38	0.324969	0.322507	0.724418	0.332215	0.607712	1.01011	0.583789	0.467103	0.00463097	0.857333	up
Gm4951	4	4	13	0	8	12	19	21	0.03038	0.041227	0.101375	0	0.058142	0.098333	0.158283	0.195038	0.0353902	1.52626	up
Sox18	484	340	327	810	282	222	409	167	6.00109	5.70559	4.40569	7.96218	3.35705	3.11006	5.55862	2.52408	0.00171035	-0.73827	down
Rxfp2	40	27	26	39	56	48	59	46	0.316331	0.283482	0.215414	0.238765	0.420428	0.424169	0.506203	0.436251	0.00421033	0.745116	up
F2	4	5	0	0	0	0	0	0	0.035497	0.066448	0	0	0	0	0	0	0.0325711	-4.36345	down
Ccdc125	10	9	29	19	38	31	36	27	0.136111	0.134106	0.274425	0.168454	0.409086	0.303715	0.335387	0.275025	0.00720357	1.05216	up
Slfn8	58	32	44	57	73	89	93	89	0.338642	0.211784	0.236597	0.224382	0.349984	0.565579	0.690317	0.544155	7.93e-05	0.952756	up
Slfn1	0	0	0	0	12	0	2	2	0	0	0	0	0.124134	0	0.023677	0.026366	0.00609242	5.0049	up
Slfn4	3	0	0	6	22	6	22	6	0.010185	0	0	0.024049	0.106987	0.034355	0.122434	0.065509	0.000312873	2.71463	up
Pah	14	5	2	18	2	6	2	2	0.130797	0.063635	0.020411	0.132917	0.017873	0.062396	0.020604	0.022944	0.0360152	-1.4942	down
Asb5	3	2	1	19	34	44	23	14	0.036905	0.033277	0.012636	0.174248	0.396543	0.5997	0.310758	0.20375	0.000199054	2.39034	up
Vmn2r53	0	5	0	5	0	0	0	0	0	0.004925	0	0.002951	0	0	0	0	0.0318933	-4.3922	down
Ifi209	9	12	12	9	33	46	23	24	0.046731	0.095073	0.076328	0.040634	0.181463	0.301942	0.146071	0.167778	8.78e-05	1.62425	up
Trem3	0	0	0	0	4	0	0	6	0	0	0	0	0.077292	0	0	0.135448	0.0317999	4.45353	up
Ern2	23	8	18	4	29	38	25	19	0.157868	0.068284	0.131541	0.017164	0.18209	0.291977	0.183792	0.15165	0.0336285	1.09961	up
Gc	0	0	10	0	0	0	0	0	0	0	0.115096	0	0	0	0	0	0.0382996	-4.42102	down
Hba-a1	11896	892	3382	13808	3730	4075	2810	3012	341.852	34.7656	105.757	314.785	103.154	132.506	88.7034	105.854	0.0386788	-0.905638	down
Hba-a2	7786	641	2307	9426	2611	2941	1895	1907	282.299	31.4953	91.0246	271.103	91.1265	120.657	75.4739	84.582	0.0413826	-0.878166	down
Gm37389	5	7	11	6	2	3	2	3	0.064058	0.104317	0.139415	0.060909	0.024586	0.028992	0.027865	0.031344	0.0271397	-1.43612	down
Irf7	79	114	98	184	288	165	351	210	0.857889	1.56546	1.02198	1.39755	2.80418	1.76031	3.75564	2.41855	4.94e-06	1.17529	up
Zbtb16	938	813	853	1301	1958	2588	1924	1938	4.3984	5.23951	4.38187	4.72405	8.52328	13.5345	9.44611	11.1456	1.54e-19	1.2048	up
Gm14308	742	0	0	0	0	0	0	0	10.0168	0	0	0	0	0	0	0	1e-07	-10.4622	down
Bik	0	2	0	0	12	2	2	2	0	0.04634	0	0	0.221509	0.034052	0.02463	0.0362	0.0220014	2.81442	up
Olfr78	44	40	43	67	25	18	44	22	0.249935	0.227381	0.211578	0.327953	0.102823	0.084996	0.316381	0.11445	0.023085	-0.737329	down
Kctd19	7	3	9	9	4	0	0	0	0.039632	0.025063	0.06295	0.041825	0.02279	0	0	0	0.00268121	-2.59875	down
Zfp180	360	208	450	402	1668	406	304	305	2.25005	1.83605	2.78028	2.02475	8.39774	2.61911	2.05932	2.47813	0.0168219	0.925993	up
Adra2b	13	4	4	6	18	12	19	12	0.066281	0.027658	0.022216	0.024265	0.087477	0.069183	0.106523	0.074919	0.0108675	1.24163	up
Duox2	0	0	0	0	3	3	1	0	0	0	0	0	0.006327	0.007438	0.001587	0	0.0473847	3.92292	up
Tas2r113	3	4	1	4	0	0	0	0	0.043201	0.091262	0.007208	0.062371	0	0	0	0	0.00355196	-4.62217	down
Ctla4	0	0	0	0	0	8	2	0	0	0	0	0	0	0.093914	0.022832	0	0.0365558	4.46536	up
2410137M14Rik	5	0	4	2	0	0	0	0	0.092895	0	0.078155	0.035862	0	0	0	0	0.0140985	-4.46615	down
Hormad2	0	3	4	4	0	0	0	0	0	0.027691	0.035437	0.032372	0	0	0	0	0.0085611	-4.50326	down
Tnfsf13b	663	513	594	798	636	219	200	520	4.78294	4.49506	3.28782	4.03822	3.71373	2.53387	1.6118	2.81052	0.021752	-0.631652	down
Tcp11	35	32	30	35	22	21	17	10	0.346885	0.435965	0.312987	0.271019	0.200674	0.225684	0.186802	0.12047	0.00976322	-0.856353	down
Psmb9	26	10	32	48	45	41	59	33	0.424784	0.181887	0.514923	0.706801	0.638714	0.706059	0.948815	0.589499	0.0250526	0.752974	up
Hist1h2an	9	2	4	7	1	1	1	3	0.41063	0.112375	0.205364	0.247613	0.034441	0.052786	0.05615	0.163614	0.0344554	-1.66668	down
Tead1	941	720	331	385	388	345	356	332	2.54476	2.52224	1.30839	1.13271	1.42207	1.33736	1.43229	1.30337	0.0130305	-0.734386	down
Caps2	29	8	18	29	36	30	30	29	0.235365	0.076815	0.137146	0.159787	0.240157	0.245677	0.226789	0.249563	0.0398538	0.689501	up
Trim72	27	14	24	21	47	19	35	35	0.299847	0.167804	0.287745	0.188675	0.495046	0.192117	0.36175	0.451914	0.0379881	0.728351	up
Xlr4c	7	3	4	4	4	22	18	9	0.091127	0.037612	0.062622	0.035422	0.039722	0.326872	0.301088	0.13286	0.0101679	1.63663	up
Xlr4b	4	8	3	2	7	13	33	5	0.081104	0.160511	0.054651	0.024441	0.091826	0.257387	0.654255	0.093809	0.0245817	1.72581	up
Pagr1a	31	17	12	42	453	34	89	173	0.877986	0.792488	0.170106	1.14144	6.25549	1.33031	1.3673	3.23856	2.11e-07	2.94019	up
Lgals3bp	625	860	786	1057	1395	1258	1503	1457	10.4018	10.4644	7.55999	7.38027	12.8622	12.7393	14.3354	15.5285	3.53e-07	0.821332	up
Olfr689	14	12	21	13	6	2	8	2	0.064667	0.056125	0.100544	0.035582	0.074725	0.042249	0.163794	0.045675	0.00194288	-1.66801	down
Pcdhga1	283	264	137	336	244	142	145	108	1.5768	1.80286	0.917093	1.41428	1.32706	0.990818	0.956185	0.810989	0.0140812	-0.62705	down
Itih4	0	6	6	12	0	2	0	0	0	0.046169	0.037146	0.049643	0	0.012059	0	0	0.00822218	-3.18225	down
Gm50092	20	19	35	23	14	17	11	8	0.193947	0.257307	0.379652	0.185699	0.135047	0.193588	0.111845	0.099306	0.0289005	-0.892885	down
Tekt3	3	4	6	4	6	13	7	12	0.022985	0.059885	0.073451	0.036465	0.06637	0.168177	0.087022	0.165322	0.038901	1.22525	up
Tekt4	60	22	33	35	71	70	62	62	0.783225	0.381825	0.467186	0.362835	0.887877	1.02679	0.878744	0.977922	0.00174201	0.908153	up
